# Supplementary material for: Scientific Teaching Targeting Faculty from Diverse Institutions
Source: Atypon-hosted journal article supplement (doi:10.1187/cbe.12-05-0061), 2013-09-01
Supplement: combinedsupmats1.pdf [file combinedsupmats1.pdf]

# Supplemental Material

*CBE—Life Sciences Education*

**Gregg et al.**

## Appendix 1

### STAR Questionnaire

#### STAR design feedback

1. How did you hear about STAR?
  - a. E-mail announcement
  - b. Department head
  - c. Colleague
  - d. Brochure at meeting
2. What role did the stipend covering travel, lodging, and per diem play in your participation in STAR?
  - a. It was not important
  - b. I could not have attended without it
  - c. Not applicable
3. What role did the stipend covering travel, lodging, and per diem play in winning support of your administration for your participation in STAR?
  - a. It was not important
  - b. I could not have attended without it
  - c. Not applicable
4. In your view, what is the best way to advertise professional development opportunities such as STAR?
  - a. E-mail announcement
  - b. Brochures at meetings
  - c. Direct mail to faculty
  - d. Contact department heads who then disseminate the information
5. How valuable was it to you (Responses: Not valuable; Moderately valuable; Very valuable; N/A)
  - a. To have colleagues who went through the same experience?
  - b. To interact with colleagues in your institution in order to implement STAR methods/changes to your teaching?
  - c. To interact with STAR alumni from other institutions in order to implement STAR methods/changes to your teaching?
6. STAR participants came from a cross-section of educational institutions, from community colleges and two-year institutions to research-intensive universities. Did this mix of faculty hinder or enhance the overall dynamics/effectiveness of the mini-institute?
  - a. Hindered greatly
  - b. Hindered
  - c. No effect
  - d. Enhanced
  - e. Enhanced greatly
7. Briefly describe your interaction with STAR colleagues:
8. My participation in the STAR mini-institute was worthwhile to me.

- a. Strongly disagree
- b. Disagree
- c. Neutral
- d. Agree
- e. Strongly agree

### **Participant demographics**

1. What percentage of your academic appointment is dedicated to teaching?
  - a. 25%
  - b. 50%
  - c. 75%
  - d. 100%
2. On average in a two-semester academic year, how many courses do you teach?
3. What level are these courses?
  - a. 100/1000 level
  - b. 200/2000 level
  - c. 300/3000 level
  - d. 400/4000 level
  - e. Graduate level
4. What is the approximate number of students that you teach each academic year?

### **Participant or student gains**

1. Rate the impact of STAR (Responses: Very negative; Negative; Neutral; Positive; Very positive)
  - a. On your teaching.
  - b. On student engagement and learning.
2. What was the attitude of your administration (Responses: Very negative; Negative; Neutral; Positive; Very positive):
  - a. To your participation in STAR?
  - b. To your implementing what you learned in STAR?
3. Please rate your gains in teaching skills after STAR (responses: No gain; Small gain; Moderate gain; Large gain; Very large gain):
  - a. Scientific teaching
  - b. Active learning
  - c. Assessment
  - d. Developing learning goals
  - e. Diversity
4. Please rate your agreement with the following statements pertaining to your use of scientific teaching (Responses: Strongly disagree; Disagree; Neutral; Agree; Strongly agree)
  - a. I think that this type of teaching improves student learning.
  - b. I think that this type of teaching engages students in the class more.
  - c. Students are completing outside learning assignments more frequently.
  - d. I see students becoming more responsible for their own learning.
  - e. I have seen my students develop more of a student learning community.
  - f. I observe students interacting more outside of class than before.
  - g. As a result of scientific teaching, fewer students are dropping the class.
  - h. Students are more motivated.
  - i. More students are passing my class now.

- j. Overall student performance has increased as compared to when I did not use scientific teaching methods.
- k. Student attendance has increased.
- l. Students develop a deeper understanding of concepts.
- m. Students use critical thinking/problem solving more.

**Implementation of Scientific Teaching techniques**

1. Did you implement part or the entire teachable unit your group developed during STAR?
  - a. Yes
  - b. No
2. Did you implement part or all of a teachable unit prepared by any other groups at STAR?
  - a. Yes
  - b. No
3. Which active learning approaches and assessment techniques have you implemented and approximately how often do you use them? Please respond to all that apply. (Responses: Once a semester; Once a month; Once a week; More than once a week)
  - a. Communicate course goals and objectives to students
  - b. Student group discussions
  - c. Cooperative learning
  - d. Problem-based learning
  - e. Case studies
  - f. Homework assignments
  - g. Think/pair/share
  - h. Scoring rubrics
  - i. Concept maps
  - j. Minute papers
  - k. In-class questions (clickers)
  - l. Muddiest point papers
4. Which forms of student feedback have you implemented and approximately how often do you use them? Please respond to all that apply. (Responses: Once a semester; Once a month; Once a week; More than once a week)
  - a. Formal student evaluations from department/college
  - b. Instructor-designed evaluations
  - c. Individual student feedback by e-mail
  - d. Individual student feedback by casual conversations
  - e. Feedback from class representative
5. Thinking back to the end of STAR, you developed an action plan for the upcoming semester. To what extent did you successfully follow this plan?
  - a. I did not follow it at all
  - b. I followed it somewhat
  - c. I followed the majority of it
  - d. I followed it completely

**Table 1 Supplement.** Example schedule for the Scientific Teaching, Assessment, and Resources (STAR) mini-institute. Overview of activities in which mini-institute participants engage during the three-day program.

|               | Monday               | Tuesday                                             | Wednesday                                             | Thursday                                     |
|---------------|----------------------|-----------------------------------------------------|-------------------------------------------------------|----------------------------------------------|
| 8:00          |                      | Registration & Coffee                               | Coffee                                                | Coffee                                       |
| 8:30 - 9:30   |                      | <b>Topic</b><br>Scientific Teaching                 | <b>Topic</b><br>Assessment                            | Group Work Time<br>Developing teachable unit |
| 9:30 – 10:00  |                      | Break                                               | Break                                                 | Teachable Unit Presentations                 |
| 10:00 – 11:00 |                      | <b>Topic</b><br>Active Learning                     | <b>Topic</b><br>Syllabus, Teaching Plans & Portfolios |                                              |
| 11:00 – 12:00 |                      | <b>Topic</b><br>Goals and Teachable Unit Discussion | Documenting Teaching Performance                      |                                              |
| 12:00 – 1:00  |                      | Lunch                                               | Keynote                                               |                                              |
| 1:00 – 4:30   | Facilitator Training | Group Work Time<br>Developing teachable unit        | Group Work Time<br>Developing teachable unit          | Lunch & Wrap up                              |
| 4:30          |                      |                                                     | Wrap up                                               | <b>Topic</b><br>Diversity                    |
|               |                      |                                                     |                                                       |                                              |

**Table 2 Supplement.** Scientific teaching sessions presented at STAR along with learning goals for each session and example activities.

| Topic                        | Goal                                                                                                                                                                 | Example Activity                                                                                                                                                  |
|------------------------------|----------------------------------------------------------------------------------------------------------------------------------------------------------------------|-------------------------------------------------------------------------------------------------------------------------------------------------------------------|
| Introduction                 | Participants learn about literature documenting reasons for students leaving STEM disciplines; discuss the need to improve undergraduate science education           | Participants answer science education opinion poll                                                                                                                |
| Active Learning              | Participants appreciate that active learning models the scientific method; understand the constructivist learning model; practice active learning techniques         | Participants engage in various active learning demonstrations then reflect on how these activities compare with traditional lectures                              |
| Teachable Unit Development   | Participants learn about the elements of a teachable unit and the goals for group work each day                                                                      | Participants engage in group discussion of strategies to incorporate diversity, active learning and assessment into teachable units                               |
| Assessment                   | Participants learn that regular classroom assessment can drive student learning and provide feedback to instructors and students                                     | Participants engage in case study illustrating misalignment of teaching and assessment; participants engage in various classroom assessment techniques            |
| Syllabus and Teaching Plans  | Participants learn to construct a syllabus that communicates learning outcomes, active learning, assessment, and how these align                                     | Participants engage in a Think-Pair-Share activity where they develop learning goals then evaluate those goals based on Bloom's taxonomy                          |
| Evaluation of Teaching       | Participants learn about methods used to document teaching effectiveness                                                                                             | Participants engage in a group discussion of the essential information needed for an effective teaching portfolio                                                 |
| Diversity                    | Participants become aware of the different learning/teaching cultures in two-year and four-year institutions; participants become aware of different learning styles | Participants take the VARK Learning Style Inventory to determine their learning styles; discuss best practices for reaching students with various learning styles |
| Group Work and Presentations | Create a teachable unit using scientific teaching concepts                                                                                                           | Participants work in groups to develop and present a teachable unit                                                                                               |
